# Supplementary material for: Characterization of Si and SiO2 in Dust Emitted during Granite Polishing as a Function of Cutting Conditions
Source: MDPI journal article supplement (doi:10.3390/ma15113965), 2022-06-02
Supplement: s1 [file s1]

## Supplementary Material

Tables S1 and S2 present the mineralogy of the white granite and Canadian anorthosite used in this study and the grain sizes of the mineral constituents. The analysis was carried out by IOS Geoscientifiques Inc. in Chicoutimi, QC, Canada.

**Table S1** Mineralogy and Grain Size of White Granite

| Mineral                | %   | Grain size  |
|------------------------|-----|-------------|
| Quartz                 | 40  | 1-5.5 mm    |
| K-feldspar             | 38  | 0.5-7 mm    |
| Plagioclase            | 19  | 1-6 mm      |
| Albite                 | ≤2  | 0.1-0.35 mm |
| Biotite                | 2   | 0.4-2 mm    |
| Chlorite               | tr  | 0.5 mm      |
| Zircon                 | tr  | ≤0.12 mm    |
| Apatite                | tr  | ≤0.15 mm    |
| Allanite?              | tr  | 0.02-0.4 mm |
| Oxides of Fe and/or Ti | 0.3 | 0.08-0.4 mm |
| Sulfides               | tr  | 0.2 mm      |

**Table S2** Mineralogy and Grain Size of Canadian anorthosite

| Mineral                         | %   | Grain size |
|---------------------------------|-----|------------|
| Plagioclase                     | 67  | 0.2-17 mm  |
| Orthopyroxene 1 (Ferrosilicate) | 21  | 1-10 mm    |
| Biotite                         | <4  | 0.2-2 mm   |
| Olivine (fayalite)              | 1   | 0.6-4 mm   |
| Chlorite                        | 1   | -          |
| Orthopyroxene 2 (hypersthene)   | tr  | 3 mm       |
| Clinopyroxene (diopside)        | tr  | 35 um      |
| Amphibole (hornblende)          | tr  | 0.1 mm     |
| Apatite                         | 1   | 1-3 mm     |
| Oxides of Fe and/or Ti          | 4.5 | 0.8-4 mm   |
| Sulfides                        | tr  | <0.3 mm    |
